# Supplementary material for: Elaborating the Occurrence and Distribution of Per- and Polyfluoroalkyl Substances in Rivers and Sediment around a Typical Aging Landfill in China
Source: MDPI journal article supplement (doi:10.3390/toxics11100852), 2023-10-11
Supplement: s1 [file s1]

This Supporting information contains 3 Tables and 6 Figures which were showed in the followings.

## Tables

**Table S1**

Summary of Water PFAS (mg/L) toxicity to aquatic organisms.

| Species                     | PFBA  | PFBS | PFOA  | PFOS   | Length of exposure | Effect |
|-----------------------------|-------|------|-------|--------|--------------------|--------|
| Lemna minor [1]             | 4760  | 7899 | -     | -      | 7 d                | EC50   |
| Neocaridina denticulate [1] | 7866  | 713  | -     | -      | 4 d                | LC50   |
| Pseudorasbora parva [1]     | 14942 | 3272 | -     | -      | 4 d                | LC50   |
| Carassius auratus [1]       | 420   | 120  | -     | -      | 48 d               | LC50   |
| Harlequin fly [2]           | -     | -    | 0.02  | 100    | 20 d               | NOAEL  |
| Cladoceran [3]              | 2180  | -    | 17.95 | 199.51 | 48 h               | LC50   |
| Trout [4]                   | -     | -    | 2.50  |        | 96 h               | LC50   |
| Bullfrog larvae [5]         | -     | -    | 99.00 | 1038   | 96 h               | LC50   |
| Haptophyta [6]              | -     | -    | 37.5  | 163.6  | 72 h               | EC50   |

LC50, concentration that caused mortality in 50% of the sampled population; EC50, concentration that results in an effect in 50% of sample population; NOAEL, No Observed Adverse Effect Level in experimental study.

**Table S2**

Sampling information

| Dates    | Water (No.)               | Sediment (No.)             |
|----------|---------------------------|----------------------------|
|          | Sampling site 1 - 12      | Sampling site 1, 2, 4 - 12 |
|          | Samples number: 12*28=336 | Samples number: 11*8=88    |
| 03, 2014 | W1                        | S1                         |
| 05, 2014 | W2                        |                            |
| 07, 2014 | W3                        | S2                         |
| 08, 2014 | W4                        |                            |
| 10, 2014 | W5                        |                            |
| 02, 2015 | W6                        |                            |
| 04, 2015 | W7                        | S3                         |
| 06, 2015 | W8                        |                            |
| 07, 2015 | W9                        |                            |
| 09, 2015 | W10                       | S4                         |
| 10, 2015 | W11                       |                            |
| 11, 2015 | W12                       |                            |
| 03, 2016 | W13                       |                            |
| 05, 2016 | W14                       | S5                         |
| 07, 2016 | W15                       |                            |
| 09, 2016 | W16                       |                            |
| 11, 2016 | W17                       |                            |
| 04, 2017 | W18                       |                            |
| 05, 2017 | W19                       |                            |
| 07, 2017 | W20                       | S6                         |
| 09, 2017 | W21                       |                            |
| 10, 2017 | W22                       |                            |
| 11, 2017 | W23                       |                            |

---

|          |     |    |
|----------|-----|----|
| 04, 2018 | W24 |    |
| 06, 2018 | W25 | S7 |
| 07, 2018 | W26 |    |
| 08, 2018 | W27 |    |
| 10, 2018 | W28 | S8 |

---

**Table S3**

The recoveries of PFASs in water and sediment

| PFASs  | Water samples |       |      |       | Sediment samples |       |      |       |
|--------|---------------|-------|------|-------|------------------|-------|------|-------|
|        | Recoveries    |       | RSD  |       | Recoveries       |       | RSD  |       |
|        | 2ppb          | 20ppb | 2ppb | 20ppb | 2ppb             | 20ppb | 2ppb | 20ppb |
| PFBA   | 104%          | 102%  | 6%   | 6%    | 100%             | 91%   | 17%  | 3%    |
| PFPeA  | 121%          | 120%  | 1%   | 7%    | 126%             | 114%  | 17%  | 6%    |
| PFHxA  | 94%           | 115%  | 1%   | 5%    | 108%             | 105%  | 11%  | 12%   |
| PFHpA  | 108%          | 121%  | 1%   | 4%    | 117%             | 110%  | 11%  | 10%   |
| PFOA   | 98%           | 114%  | 4%   | 6%    | 159%             | 105%  | 43%  | 16%   |
| PFNA   | 103%          | 118%  | 2%   | 4%    | 120%             | 110%  | 9%   | 15%   |
| PFDA   | 107%          | 109%  | 1%   | 11%   | 130%             | 127%  | 12%  | 11%   |
| PFDoDA | 208%          | 118%  | 8%   | 10%   | 112%             | 125%  | 18%  | 17%   |
| PFBS   | 90%           | 104%  | 1%   | 6%    | 102%             | 101%  | 13%  | 3%    |
| PFHxS  | 106%          | 113%  | 2%   | 1%    | 105%             | 103%  | 11%  | 3%    |
| PFOS   | 112%          | 100%  | 6%   | 4%    | 118%             | 117%  | 5%   | 3%    |

**Table S4**

HQs for the four PFASs in the water and sediment

| Sampling site | Water    |          |          |          | Sediment |                 |          |          |
|---------------|----------|----------|----------|----------|----------|-----------------|----------|----------|
|               | PFBA     | PFOA     | PFBS     | PFOS     | PFBA     | PFOA            | PFBS     | PFOS     |
| S1            | 2.13E-07 | 1.50E-05 | 5.32E-08 | 5.29E-03 | 1.46E-04 | 7.89E-03        | 2.80E-05 | 3.34E-02 |
| S2            | 4.35E-07 | 2.44E-05 | 1.41E-07 | 6.92E-03 | 1.11E-04 | 1.99E-02        | 3.51E-05 | 5.34E-02 |
| S3            | 9.51E-06 | 1.26E-03 | 2.78E-06 | 4.13E-02 | -        | -               | -        |          |
| S4            | 3.47E-06 | 1.69E-04 | 5.26E-07 | 1.58E-02 | 8.22E-04 | <b>2.53E-01</b> | 1.04E-04 | 5.67E-02 |
| S5            | 2.76E-06 | 8.25E-05 | 3.84E-07 | 1.18E-02 | 8.86E-04 | 5.72E-02        | 5.23E-05 | 6.27E-02 |
| S6            | 1.60E-06 | 5.66E-05 | 3.07E-07 | 1.19E-02 | 2.12E-04 | 2.99E-02        | 7.92E-05 | 5.99E-02 |
| S7            | 1.05E-06 | 5.14E-05 | 2.62E-07 | 6.01E-03 | 1.01E-04 | 2.05E-02        | 4.08E-05 | 5.24E-02 |
| S8            | 7.75E-07 | 4.03E-05 | 2.40E-07 | 1.04E-02 | 8.13E-05 | 2.36E-02        | 9.00E-05 | 5.26E-02 |
| S9            | 9.80E-07 | 4.54E-05 | 2.46E-07 | 7.77E-03 | 3.33E-04 | 5.34E-02        | 8.50E-05 | 6.59E-02 |
| S10           | 6.11E-07 | 3.28E-05 | 1.55E-07 | 6.51E-03 | 2.35E-04 | 5.98E-02        | 5.26E-05 | 7.05E-02 |
| S11           | 2.95E-07 | 2.68E-05 | 1.23E-07 | 6.05E-03 | 3.37E-04 | 4.82E-02        | 1.33E-04 | 6.66E-02 |
| S12           | 1.99E-07 | 9.51E-06 | 3.16E-08 | 2.85E-03 | 3.90E-04 | 3.60E-02        | 1.52E-05 | 3.82E-02 |

**Figure**

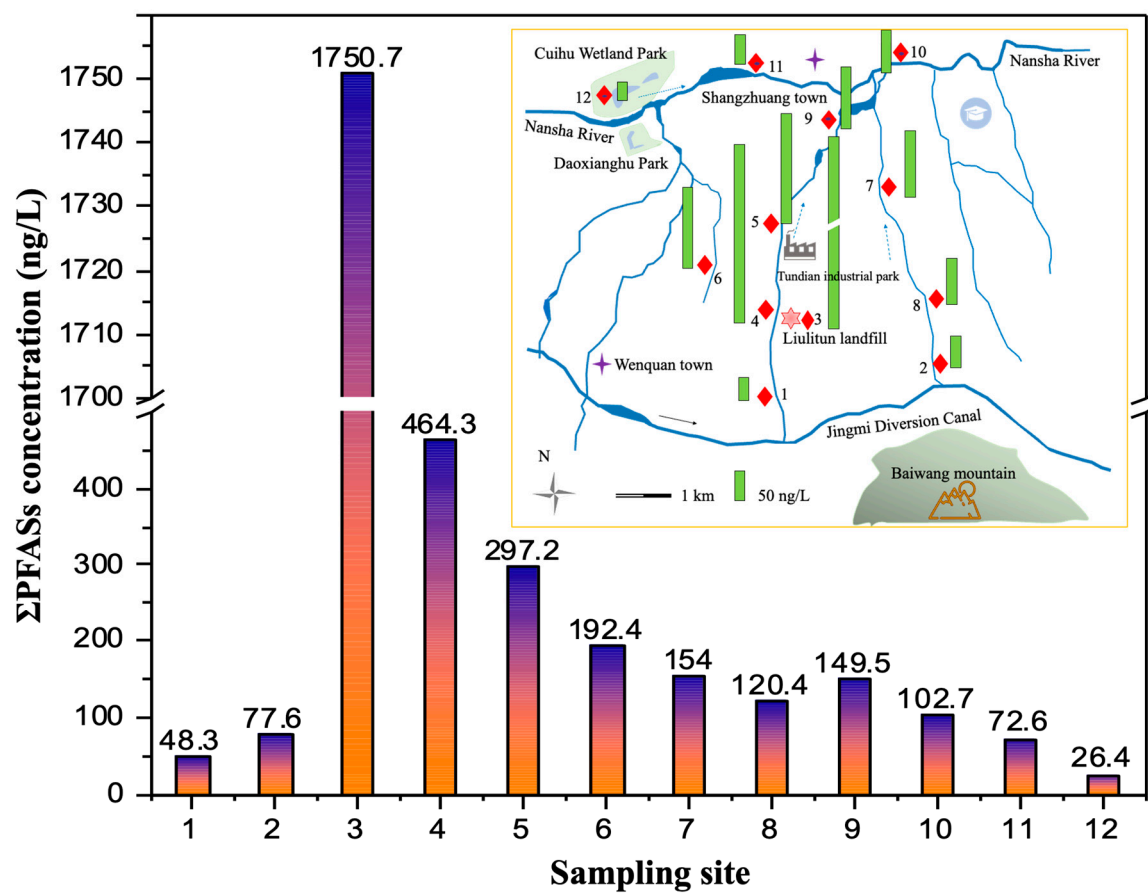

**Figure S1** Spatial distribution of average PFASs concentration at each sampling site in water samples in five years

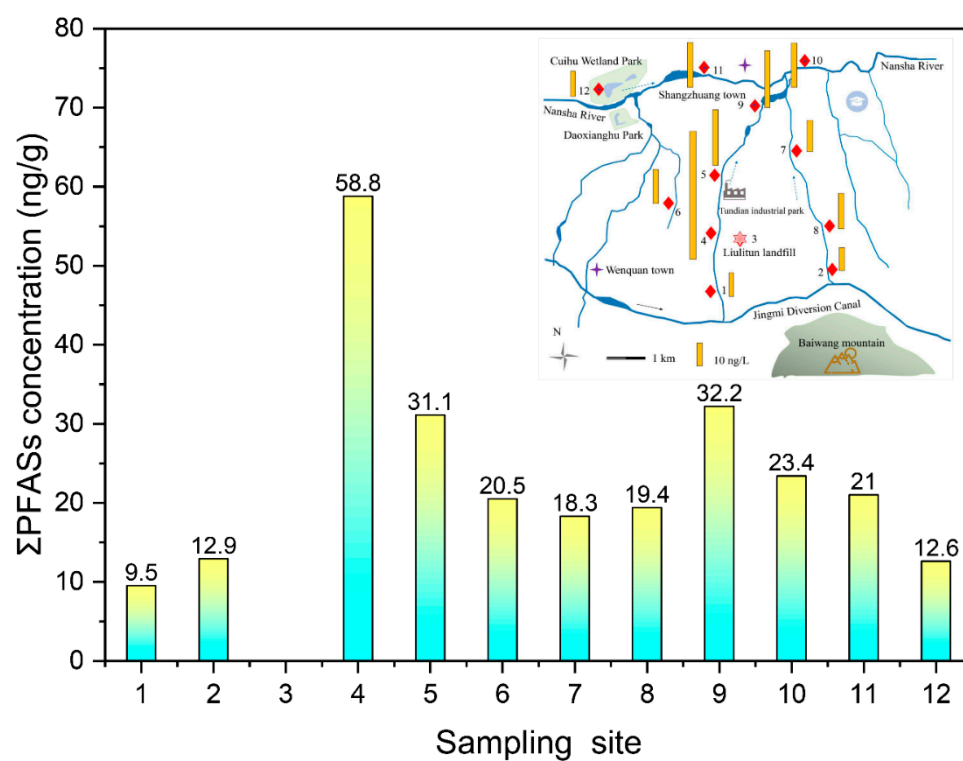

**Figure S2** Spatial distribution of average PFASs concentration at each sampling site in sediment samples in five years

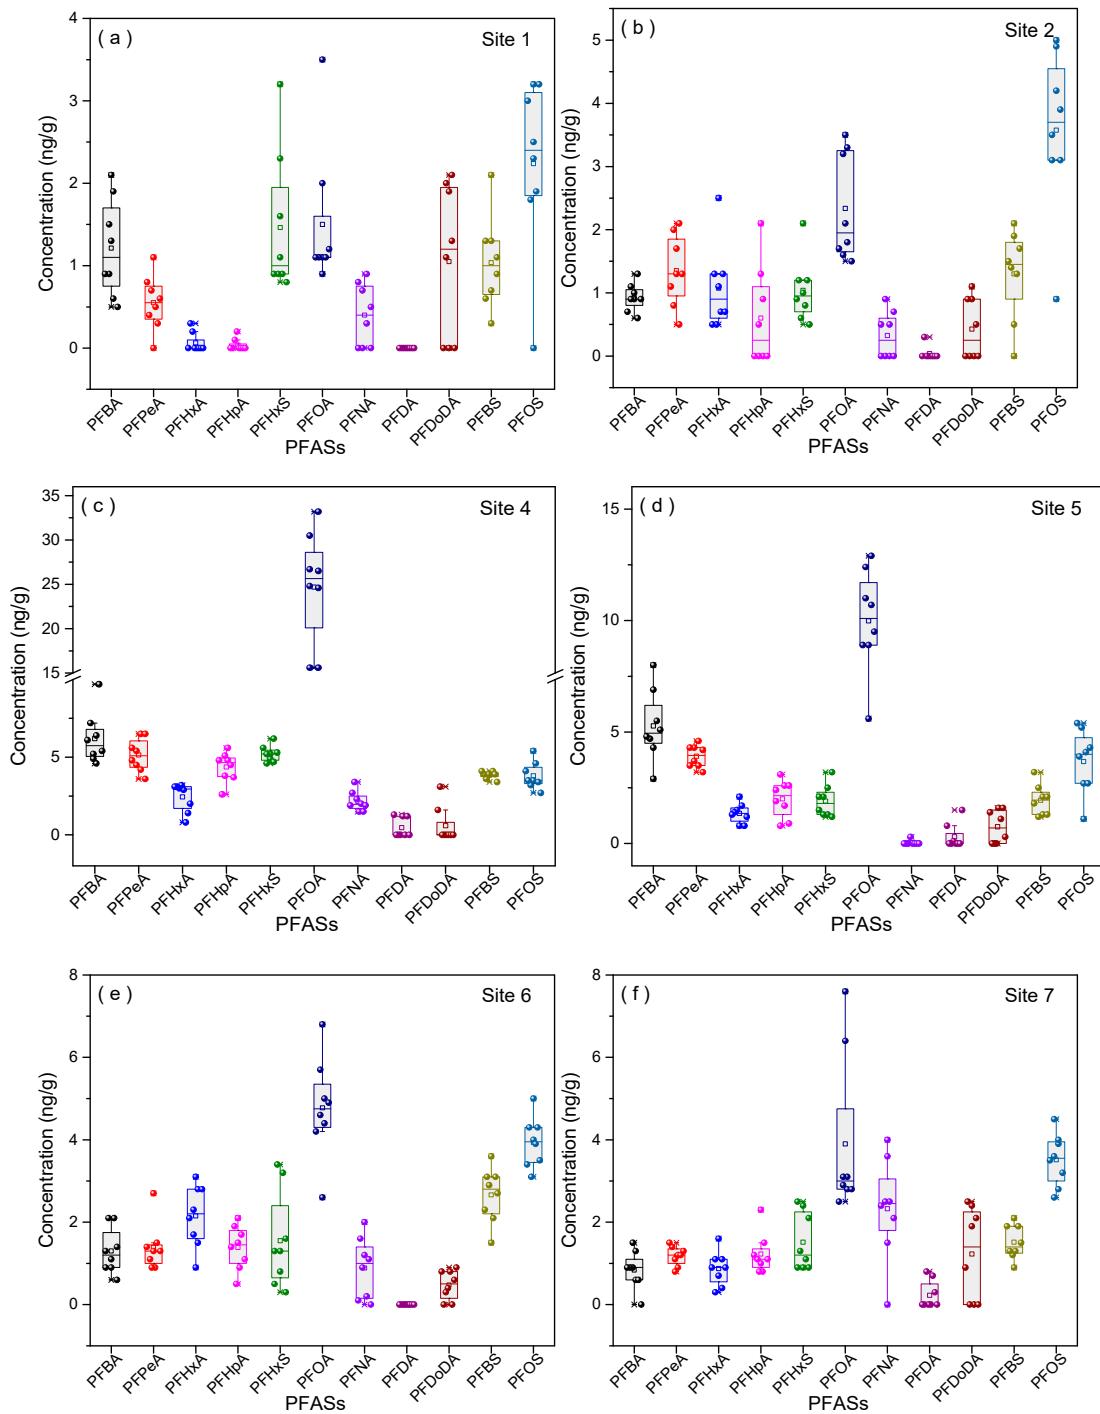



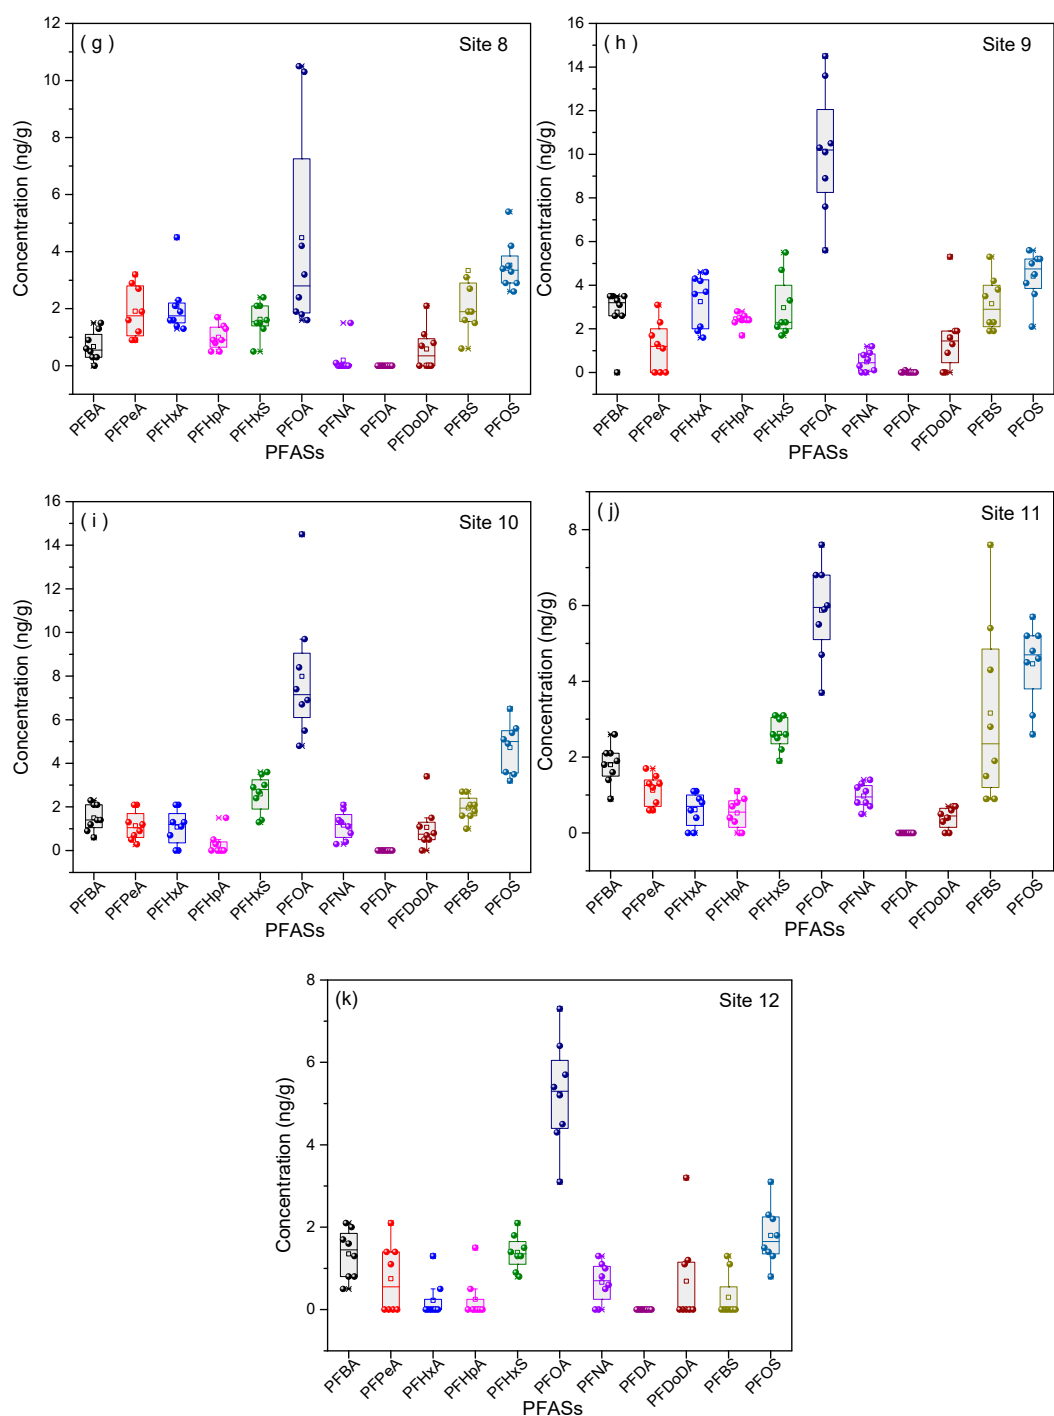

**Figure S3** Box-whisker plots of PFASs in sediment from 11 sampling sites around the target landfill in five years. Data with < 80% detected concentrations in all sites were excluded.

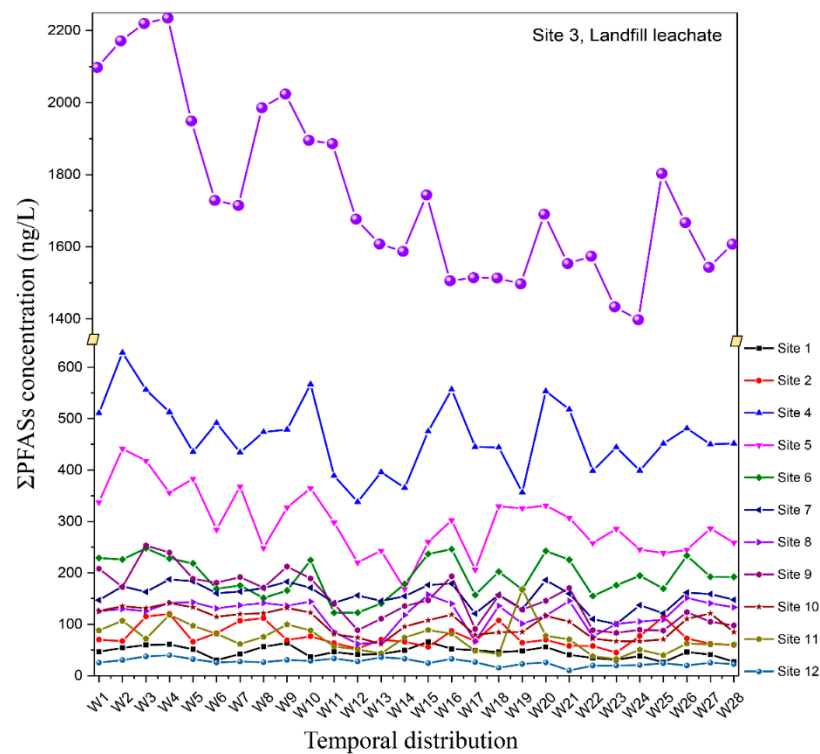

**Figure S4** Temporal distribution of average PFASs concentration at each sampling site in water samples in five years

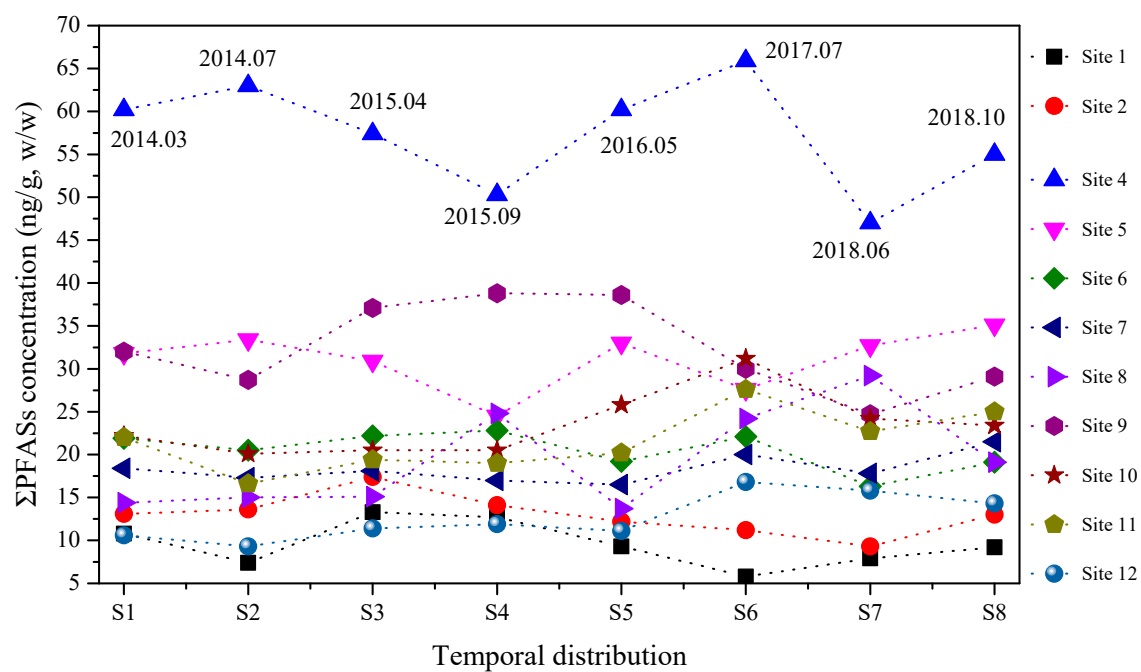

**Figure S5** Temporal distribution of average PFASs concentration at each sampling site in sediment samples in five years

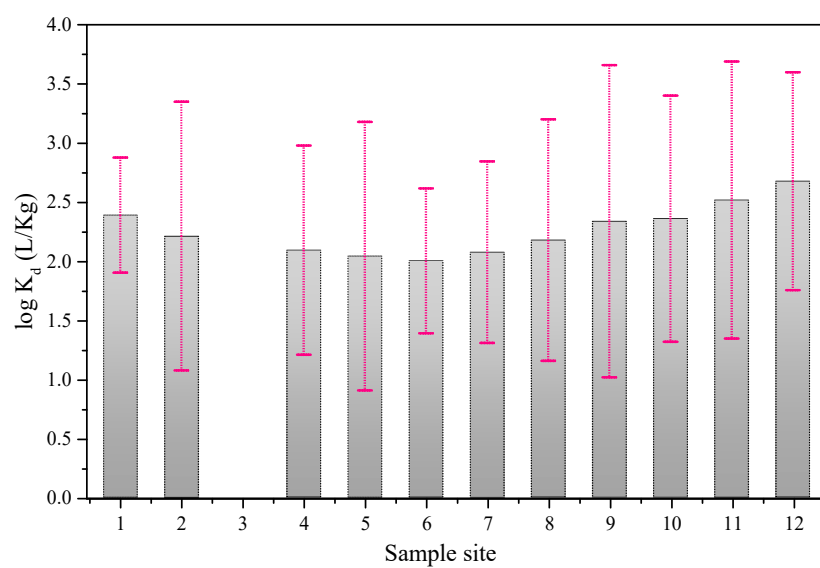

**Figure S6** Average  $\log K_d$  values of PFASs in sediment and river (stream) at different sampling site

## References

1. Zhang, Y.-H.; Ding, T.-T.; Huang, Z.-Y.; Liang, H.-Y.; Du, S.-L.; Zhang, J.; Li, H.-X. Environmental exposure and ecological risk of perfluorinated substances (PFASs) in the Shaying River Basin, China. *Chemosphere* **2023**, *339*, 139537-139537, doi:10.1016/j.chemosphere.2023.139537.
2. Marziali, L.; Federica R.; Valsecchi, S.; Polesello, S.; Stefani, F. Effects of perfluoralkyl substances on a multigenerational scale: a case study with *Chironomus riparius* (Diptera, chironomidae). *Environ. Toxicol. Chem* **2019**, *38*, 988e999, doi.org/10.1002/etc.4392.
3. Ji, K.H.; Kim, Y.-H.; Oh, S.; Ahn, B.-W.; Jo, H.-Y.; Choi, K.-H. Toxicity of perfluorooctane sulfonic acid and perfluorooctanoic acid on freshwater macroinvertebrates (*Daphnia magna* and *Moina macrocopa*) and fish (*Oryzias latipes*). *Environ. Toxicol. Chem* **2008**, *27* (10), 2159. <https://doi.org/10.1897/07-523.1>.
4. Sharpe, Rainie L.; Benskin, Jonathan P.; Laarman, Anne H.; MacLeod, Sherri L.; Martin, Jonathan W.; Wong, Charles S.; Goss, Greg G. Perfluorooctane sulfonate toxicity, isomer-specific accumulation, and maternal transfer in zebrafish (*Danio rerio*) and rainbow trout (*Oncorhynchus mykiss*). *Environ. Toxicol. Chem* **2010**, *29*, 1957e1966. <https://doi.org/10.1002/etc.257>.
5. Flynn, R. Wesley, Chislock, Michael F., Gannon, Megan E., Bauer, Stephanie J., Tornabene, Brian J., Hoverman, Jason T., Sepúlveda, Maria S. Acute and chronic effects of perfluoroalkyl substance mixtures on larval American bullfrogs (*Rana catesbeiana*). *Chemosphere* **2019**, *236*, 124350. <https://doi.org/10.1016/j.chemosphere.2019.124350>.
6. Mhadhbi, Lazhar, Rial, Diego, Pérez, Sara, Beiras, Ricardo. Ecological risk assessment of perfluorooctanoic acid (PFOA) and perfluorooctanesulfonic acid (PFOS) in marine environment using *isochrysis galbana*, *Paracentrotus lividus*, *siriella armata* and *psetta maxima*. *J. Environ. Monit.* **2012**, *14*, 1375e1382. <https://doi.org/10.1039/c2em30037k>.
